# Supplementary material for: The Marine Natural Product Pseudopterosin Blocks Cytokine Release of Triple-Negative Breast Cancer and Monocytic Leukemia Cells by Inhibiting NF-κB Signaling
Source: MDPI journal article supplement (doi:10.3390/md15090262), 2017-08-23
Supplement: s1 [file s1]

## Supplement

**Figure S1.** Pseudopterostin inhibits activation of NF- $\kappa$ B after two different stimuli. Cells are stably transfected with a NF- $\kappa$ B-Luc reporter gene. PsA-D treatment was performed for 20 minutes following 1  $\mu$ g/ml LPS or 6 ng TNF $\alpha$  incubation for 1 hour. Error bars were calculated using +SEM; n=3. Three stars show a significance of p<0.001.

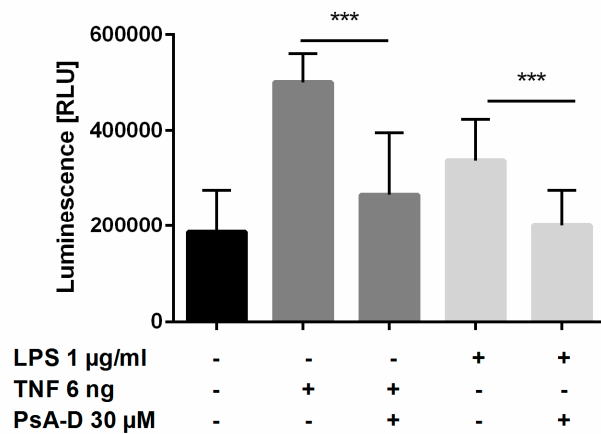

**Figure S2.** PsA-D blocked phosphorylation of NF- $\kappa$ B/p65 and I $\kappa$ B $\alpha$ . MDA-MB-231 cells were seeded in a 10 cm dish. Treatment with 30  $\mu$ M PsA-D for 15 minutes was followed with treatment of 6 ng TNF $\alpha$  for 15 minutes. Cells were lysed and protein concentration was measured with Bradford Reagent. A total protein amount of 0.8 mg/ml was used. Control cells were treated with DMSO in the same amounts as PsA-D. Error bars were calculated using +SEM; n=3. P-values of three stars show a significance of p<0,001.

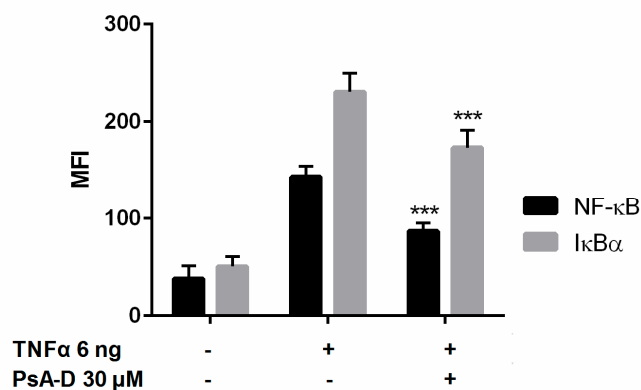

**Table S1.** Inhibition of cytokine release in MDA-MB-453 triple negative breast cancer cells. MDA-MB-453 cells were seeded at a density of  $6 \times 10^6$  cells per ml. 30  $\mu$ M PsA-D was incubated for 20 minutes followed by 20 ng/ml TNF $\alpha$ . Cytokine amounts were analyzed in supernatants after 24 hours incubation time. No treatment serves as a control. Values were normalized to TNF $\alpha$  treatment and set to 100 %  $\pm$ SD. % inhibition reflects the percentage of the amount of cytokines reduced by PsA-D treatment compared to TNF $\alpha$ . P-values were analyzed according to student's t-test; n=3.

| MDA-MB-453 | Control %          | +TNF $\alpha$ %     | +PsA-D %           | p-value | % Inhibition |
|------------|--------------------|---------------------|--------------------|---------|--------------|
| IL-8       | 4,7 ( $\pm$ 5,5)   | 100,5 ( $\pm$ 24,9) | 51,7 ( $\pm$ 14,0) | 0,012   | 48,9         |
| MCP-1      | 17,3 ( $\pm$ 11,6) | 97,4 ( $\pm$ 7,9)   | 87,2 ( $\pm$ 14,1) | 0,43    | 10,2         |
